# Supplementary material for: A Cadaveric Comparative Study on the Surgical Accuracy of Freehand, Computer Navigation, and Patient-Specific Instruments in Joint-Preserving Bone Tumor Resections
Source: Hindawi journal article supplement (doi:10.1155/2018/4065846), 2018-11-13
Supplement: f1 [file 4065846.f1.pdf]

## Supplementary file

| Location accuracy (mm)       |       |                  | Freehand   | Freehand corrected | CAS       | CAS corrected | PSI       | CAS+PSI |
|------------------------------|-------|------------------|------------|--------------------|-----------|---------------|-----------|---------|
| Left                         | Tibia | Distal plane     | 8.65       | 9.1                | 2.1       | 2.55          | 0.74      | 0.85    |
|                              |       | Proximal lateral | 15.13      | 15.58              | 2.36      | 1.91          | 1.1       | 2.33    |
|                              |       | Proximal medial  | 6.55       | 7                  | 3.45      | 3.9           | 0.55      | 0.76    |
|                              |       | Proximal central | 11.21      | 11.66              | 0.99      | 1.44          | 0.93      | 1.94    |
|                              | Femur | Proximal plane   | 9.3        | 10.75              | 7.4       | 7.85          | 2.61      | 1.66    |
|                              |       | Distal lateral   | 10.26      | 11.71              | 7.54      | 7.09          | 2.58      | 1.55    |
|                              |       | Distal medial    | 13.16      | 11.71              | 2.39      | 1.94          | 1.38      | 1.16    |
| Right                        | Tibia | Distal plane     | 4.95       | 5.4                | 3.86      | 3.41          | 3.2       | 2.75    |
|                              |       | Proximal lateral | 7.8        | 8.35               | 5.69      | 6.14          | 1.13      | 1.6     |
|                              |       | Proximal medial  | 3.28       | 3.83               | 1.46      | 1.91          | 2.17      | 2       |
|                              |       | Proximal central | 9.92       | 8.47               | 1.79      | 2.24          | 4.4       | 4.61    |
|                              | Femur | Proximal plane   | 11.85      | 12.4               | 3.32      | 3.77          | 2.04      | 1.12    |
|                              |       | Distal lateral   | 5.18       | 4.63               | 4.46      | 4.91          | 1.97      | 2.25    |
|                              |       | Distal medial    | 8.15       | 7.6                | 2.41      | 1.96          | 1.92      | 3.26    |
| Mean (mm)                    |       |                  | 9.16       |                    | 3.64      | 1.91          | 1.99      |         |
| Standard deviation           |       |                  | 3.34       |                    | 2.10      | 1.06          | 1.04      |         |
| 95% Confidence interval (CI) |       |                  | 8.02-10.29 |                    | 2.52-4.77 | 0.78-3.04     | 0.86-3.11 |         |

Table 1 - Location accuracy in mm defined as a maximum deviation from the target or planned plane. The location accuracy in the freehand and navigation-assisted resections are corrected by half a kerf, 0.45 mm, minus or plus according to the direction of the measured error (towards the resection part or not). Standard deviation (sd) and 95% confidence interval (CI) are shown for the means of all groups.
